# Supplementary material
Source: Springer Nature journal article supplement (https://www.springermedizin.de/resource/supplementary/12985_2011_1766_MOESM1_ESM.pdf/9611064)

HIV<sup>GFP-Vpr</sup>

HIV<sup>ΔenvGFP-Vpr</sup>

Untreated

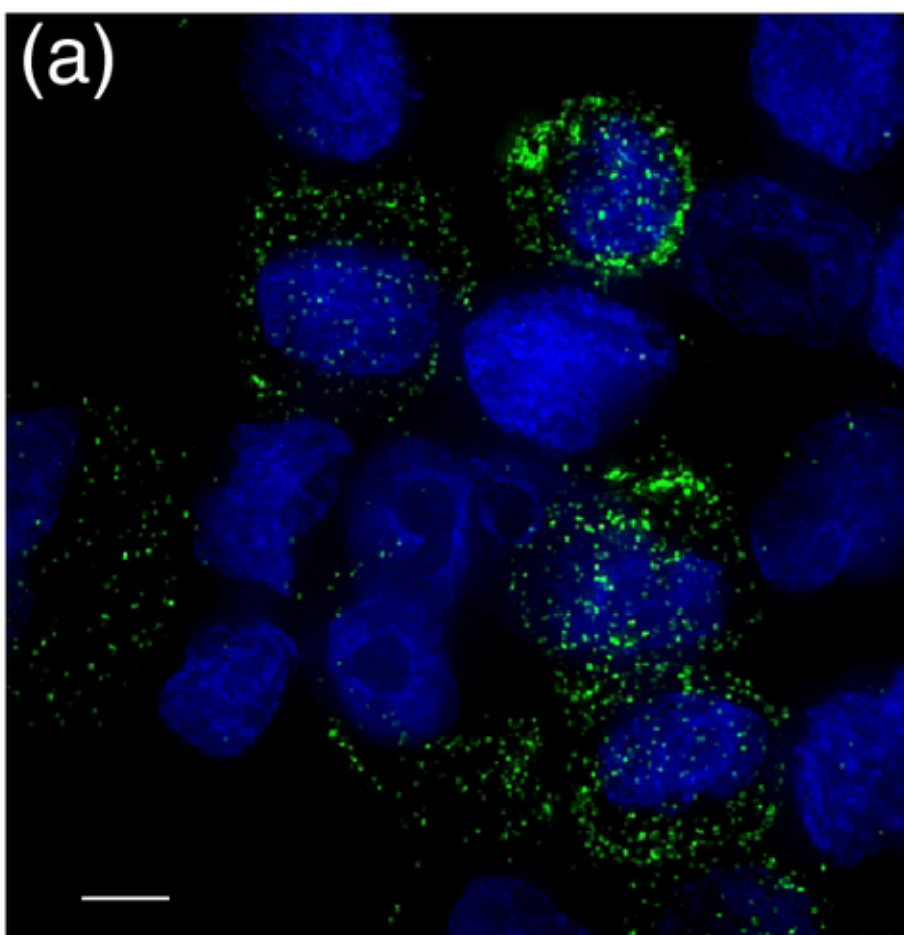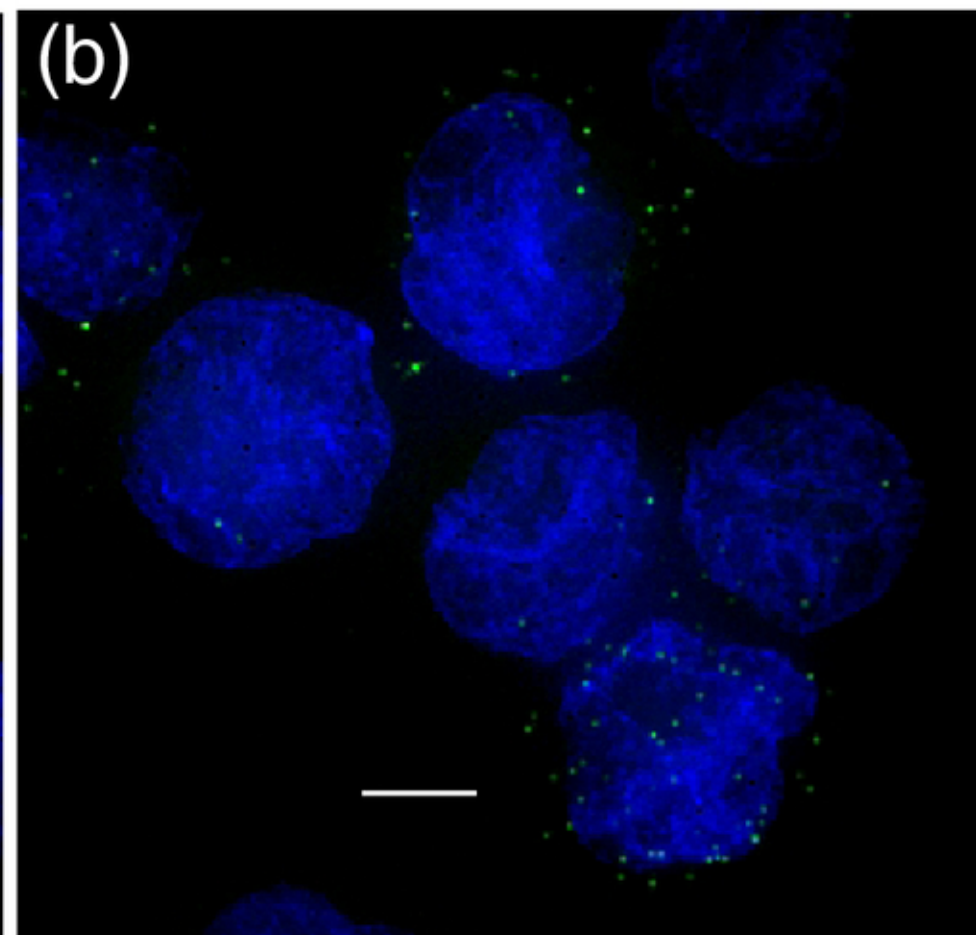

Pronase  
treated

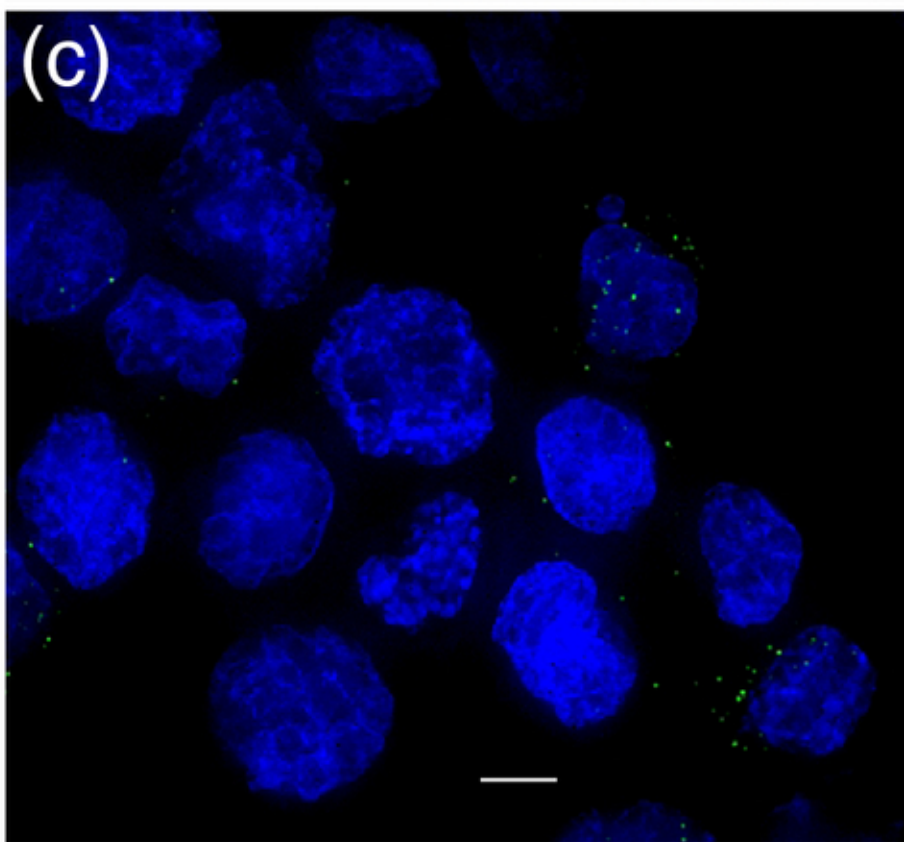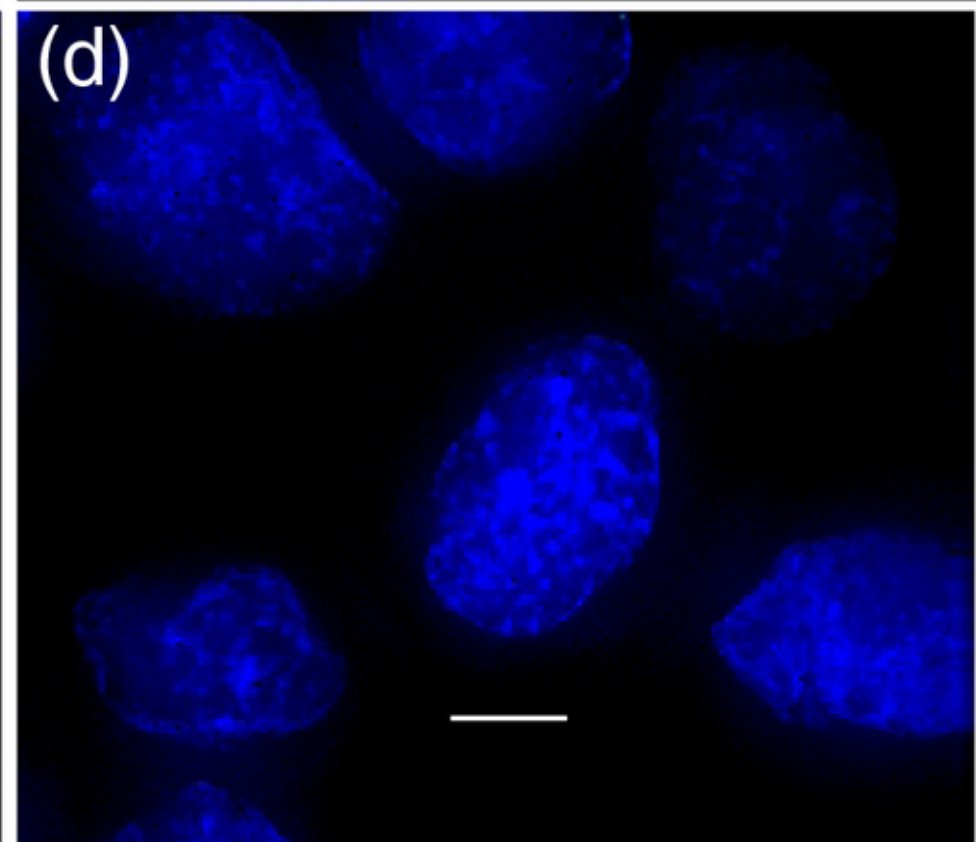

Supplement: MOESM1 [file 9611064]
